# Supplementary material for: Hes1 triggers epithelial-mesenchymal transition (EMT)-like cellular marker alterations and promotes invasion and metastasis of nasopharyngeal carcinoma by activating the PTEN/AKT pathway
Source: PubMed Central journal article supplement (PMC4742206; doi:10.18632/oncotarget.5457), 2015-10-02
Supplement: oncotarget-06-36713-s001.pdf [file oncotarget-06-36713-s001.pdf]

SUPPLEMENTARY FIGURES AND TABLES

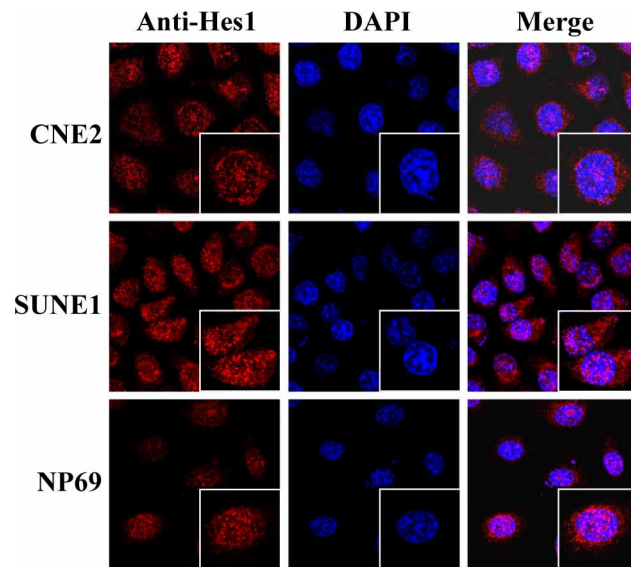

Supplementary Figure S1: Immunofluorescence assay indicated the distribution of Hes1 protein in the nucleus and cytoplasm of NP69, CNE2 and SUNE1 cells. The nuclei were stained with 4',6-diamidino-2-phenylindole (DAPI).

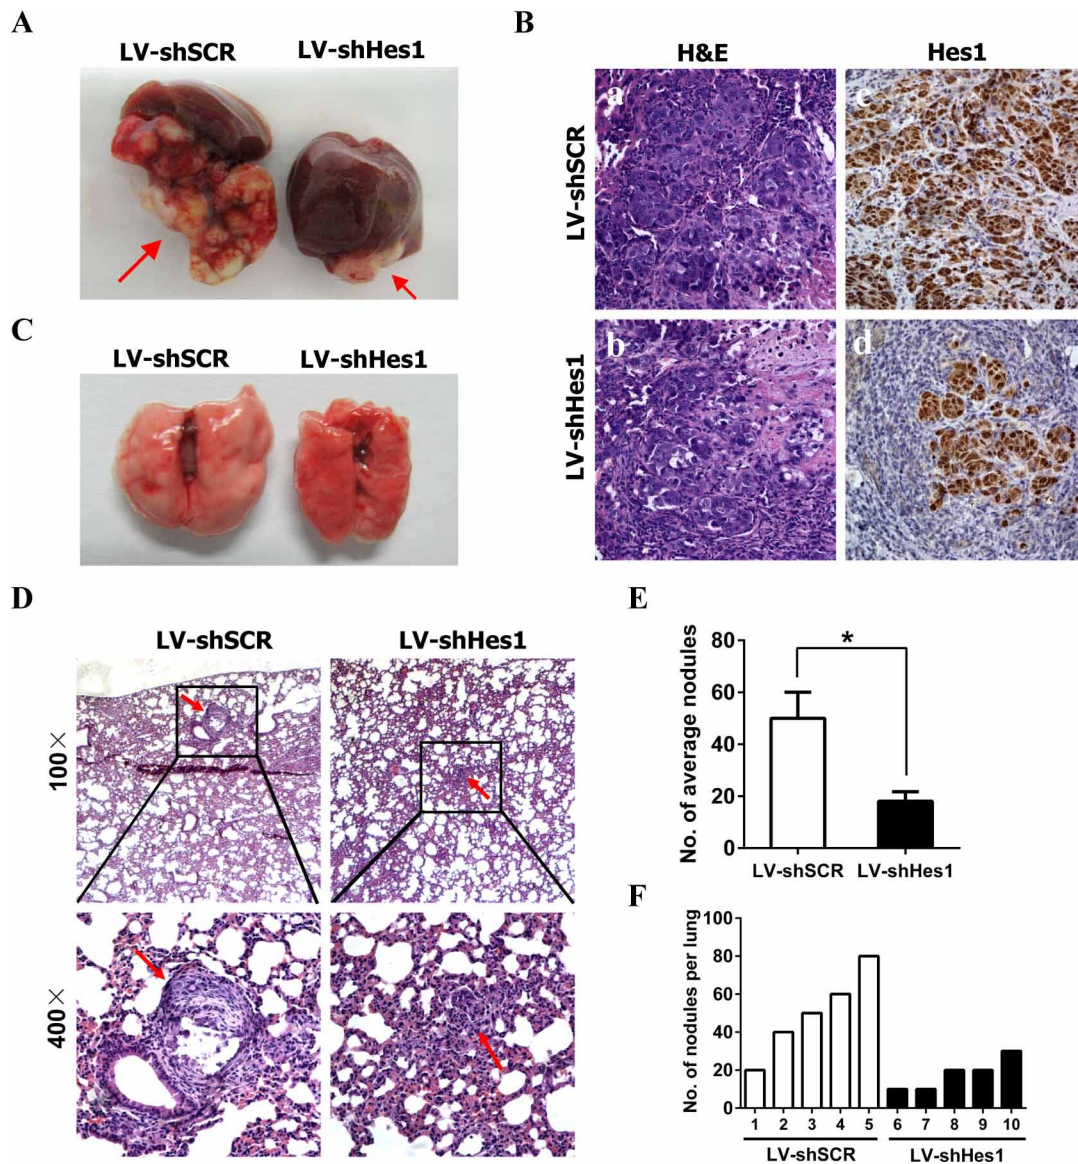

**Supplementary Figure S2: RNAi-mediated silencing of endogenous Hes1 in CNE2 cells inhibited metastasis.** **A.** Representative livers from nude mice 40 days after subcapsular liver transplantation of Hes1-shRNA- or scrambled shRNA-expressing CNE2 cells (LV-shHes1 or LV-shSCR) (5 mice/group). Arrows indicate primarily formed tumors. **B.** H&E staining (left) and IHC analysis of Hes1 expression (right) of primary tumors in the liver of nude mice (Original magnification:  $\times 400$ ). **C–D.** Representative lungs (C) and H&E staining of lung sections (D) of nude mice 40 days after subcapsular liver transplantation of Hes1-shRNA- or scrambled shRNA-expressing CNE2 cells. Red arrow indicates the metastatic tumor nodes. **E–F.** The number of spontaneous lung metastatic nodules in nude mice based on 10 serial sections per sample.

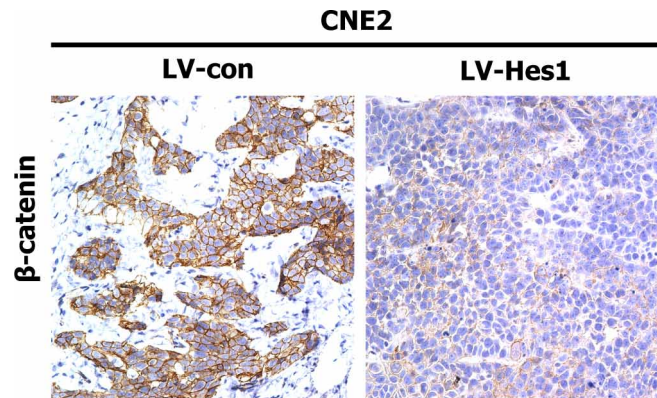

**Supplementary Figure S3: The distribution of β-catenin was detected in the nucleus and cytoplasm of cancer cells by IHC.** In this study, vector- or Hes1-expressing CNE2 cells were subcapsularly transplanted into the liver of nude mice and formed primary tumors in liver, followed by detecting the expression of β-catenin in formed primary tumors by immunohistochemistry (IHC).

**Supplementary Table S1: Expression of Hes1 in 29 non-cancerous epithelial tissues and 103 NPC tissues**

| Variables                        | <i>n</i> | Hes1 expression     |                      | $\chi^2$ | <i>P</i> |
|----------------------------------|----------|---------------------|----------------------|----------|----------|
|                                  |          | Low ( <i>n</i> , %) | High ( <i>n</i> , %) |          |          |
| non-cancerous epithelial tissues | 29       | 19 (65.5)           | 10 (34.5)            | 4.715    | 0.03     |
| NPC                              | 103      | 44 (42.7)           | 59 (57.3)            |          |          |

**Supplementary Table S2: Univariate and multivariate analyses of the overall survival of 103 patients with NPC**

| Variables         | Univariate analysis |          | Multivariate analysis |          |
|-------------------|---------------------|----------|-----------------------|----------|
|                   | HR (95% CI)         | <i>P</i> | HR (95% CI)           | <i>P</i> |
| Gender            |                     |          |                       |          |
| Female vs. Male   | 1.135 (0.572–2.253) | 0.716    |                       |          |
| Age (y)           |                     |          |                       |          |
| < 50 vs. ≥ 50     | 0.917 (0.502–1.675) | 0.779    |                       |          |
| Histological type |                     |          |                       |          |
| DNKC vs. UDC      | 1.010 (0.426–2.394) | 0.982    |                       |          |
| T classification  |                     |          |                       |          |
| T1-T2 vs. T3-T4   | 1.339 (0.730–2.456) | 0.345    |                       |          |
| N classification  |                     |          |                       |          |
| N0-N1 vs. N2-N3   | 2.067 (1.130–3.783) | 0.019    | 1.120 (0.575–2.180)   | 0.740    |
| M classification  |                     |          |                       |          |
| No vs. Yes        | 4.421 (2.209–8.847) | 0.000    | 2.606 (1.245–5.453)   | 0.011    |
| Clinical stage    |                     |          |                       |          |
| I-II vs. III-IV   | 3.434 (1.349–8.746) | 0.010    | 2.035 (0.679–6.095)   | 0.205    |
| Tumor recurrence  |                     |          |                       |          |
| No vs. Yes        | 3.619 (1.874–6.987) | 0.000    | 4.108 (2.042–8.265)   | 0.000    |
| Hes1 expression   |                     |          |                       |          |
| Low vs. High      | 2.803 (1.405–5.592) | 0.003    | 2.146 (0.990–4.653)   | 0.053    |

HR: hazard ratio; 95%CI: 95% confidence interval.

**Supplementary Table S3: Expression of PTEN in the 29 non-cancerous epithelial tissues and 103 NPC tissues**

| Variables                        | <i>n</i> | PTEN expression     |                      | $\chi^2$ | <i>P</i> |
|----------------------------------|----------|---------------------|----------------------|----------|----------|
|                                  |          | Low ( <i>n</i> , %) | High ( <i>n</i> , %) |          |          |
| non-cancerous epithelial tissues | 29       | 6 (20.7)            | 23 (79.3)            | 19.772   | 0.001    |
| NPC                              | 103      | 69 (70.0)           | 34 (30.0)            |          |          |

**Supplementary Table S4: Association of Hes1 expression and PTEN and EMT markers in 103 NPC tissues**

| Variables       | <i>n</i> | Hes1 expression     |                      | <i>P</i> |
|-----------------|----------|---------------------|----------------------|----------|
|                 |          | Low ( <i>n</i> , %) | High ( <i>n</i> , %) |          |
| E-cadherin      |          |                     |                      |          |
| Low expression  | 81       | 29 (35.8)           | 52 (64.2)            | 0.006    |
| High expression | 22       | 15 (68.2)           | 7 (31.8)             |          |
| Fibronectin     |          |                     |                      |          |
| Low expression  | 61       | 35 (57.4)           | 26 (42.6)            | 0.000    |
| High expression | 42       | 9 (21.4)            | 33 (78.6)            |          |
| Snail           |          |                     |                      |          |
| Low expression  | 49       | 29 (59.2)           | 20 (40.8)            | 0.001    |
| High expression | 54       | 15 (27.8)           | 39 (72.2)            |          |
| PTEN            |          |                     |                      |          |
| Low expression  | 69       | 23 (33.3)           | 46 (66.7)            | 0.006    |
| High expression | 34       | 21(61.8)            | 13 (38.2)            |          |

**Supplementary Table S5: Primers used in quantitative real-time PCR (qRT-PCR) assay**

| Gene       | Forward primer (5'–3') | Reverse primer (5'–3') |
|------------|------------------------|------------------------|
| Hes1       | ACGTGCGAGGGCGTTAATAC   | GGGGTAGGTCATGGCATTGA   |
| E-cadherin | TGCCCAGAAAATGAAAAAGG   | GTGTATGTGGCAATGCGTTC   |
| β-catenin  | AGGTCTGAGGAGCAGCTTCA   | ATTGTCCACGCTGGATTTTC   |
| N-cadherin | ACAGTGGCCACCTACAAAGG   | CCGAGATGGGGTTGATAATG   |
| Vimentin   | GAGAACTTTGCCGTTGAAGC   | GCTTCCTGTAGGTGGCAATC   |
| PTEN       | TTTGAAGACCATAACCCACCAC | ATTACACCAGTTCGTCCCTTTC |
| GAPDH      | ACCCAGAAGACTGTGGATGG   | TCTAGACGGCAGGTCAGGTC   |

**Supplementary Table S6: Primers used in ChIP assays**

| ChIP-primer | Forward primer (5'–3') | Reverse primer (5'–3') |
|-------------|------------------------|------------------------|
| PTEN-A      | AGGTCTCAGTCCTTTGGCTTGC | TGGTTACACAAGCACCCACATC |
| PTEN-B      | GGGAGTGGGAATTTGGAAAG   | TCAAAAGGAGGTGGAAGGAT   |
| PTEN-C      | TCCCTGCATTTCCCTCTACA   | GTGCGTTGAGCAGTGTCACT   |
| PTEN-D      | GTGATGTGGCGGGACTCTTTAT | CTCTCATCTCCCTCGCCTGAG  |
